# Supplementary material
Source: PubMed Central journal article supplement (PMC298725)
Supplement: pnas_0334222100_2.pdf [file pnas_0334222100_2.pdf]

## Analyses and Results

### 1. Trees and Node Identities

Branch lengths and node identities for the Murphy *et al.* (1) ML tree, myomorph root tree, and “K/T body size” tree, all with the 16,397-bp data set and a 105 mya mean prior for the placental root.

#### Tree with branch lengths for 16,397-bp data set

((((Sloth: 0.0578572942,Anteater: 0.0623650084): 0.0094164783,Armadillo: 0.0572305302): 0.0322442137,(((Hedgehog: 0.1392078545,Shrew: 0.1258264678): 0.0123632517,Mole: 0.0879580377): 0.0121989399,((Phyllostom: 0.0945937341,Free\_taile: 0.0472104631): 0.0116820995,(False\_vamp: 0.0633704115,(Flying\_Fox: 0.0188418469,Rousette: 0.0191538273): 0.0371695005): 0.0048946112): 0.0165262807,((((Whale: 0.0140275224,Dolphin: 0.0222707941): 0.0198499013,Hippo: 0.0404138600): 0.0050515078,Ruminant: 0.0742379613): 0.0085522183,Pig: 0.0682202252): 0.0060476331,Llama: 0.0626939662): 0.0279684968, ((Horse: 0.0443185833,(Rhino: 0.0290890501,Tapir: 0.0289317375): 0.0052985665): 0.0207923372,((Cat: 0.0469186509,Caniform: 0.0566763915): 0.0235084254,Pangolin: 0.0768207855): 0.0039345272): 0.0017028512): 0.0012539449): 0.0024184758): 0.0111253741,(((Sciurid: 0.0850914642,((Mouse: 0.0425278845,Rat: 0.0462323784): 0.1235036677,(Hystricid: 0.0756784923,Caviomorph: 0.0879289745): 0.0628855607): 0.0055760999): 0.0120897870,(Rabbit: 0.0585024643,Pika: 0.1102127449): 0.0444145927): 0.0059179821,((Flying\_Lem: 0.0622042730,Tree\_Shrew: 0.1030697599): 0.0041661047, (Strepsirrh: 0.0771985156,Human: 0.0659650908): 0.0097329644): 0.0016018333): 0.0079362557): 0.0095144758): 0.0064056468,(((Tenrecid: 0.1453187340,Golden\_Mol: 0.0680711793): 0.0095742492,(Sh\_Ear\_Ele: 0.0394494700,Lo\_Ear\_Ele: 0.0366004575): 0.0901634538): 0.0022328898,Aardvark: 0.0695556373): 0.0033397999,((Sirenian: 0.0386004784,Hyrax: 0.0908379326): 0.0030251594,Elephant: 0.0515068155): 0.0149741288): 0.0257744494);

list of names and tip numbers follows:

Sloth 0  
Anteater 1  
Armadillo 2  
Hedgehog 3  
Shrew 4  
Mole 5  
Phyllostom 6  
Free\_taile 7  
False\_vamp 8  
Flying\_Fox 9  
Rousette 10

Whale 11  
Dolphin 12  
Hippo 13  
Ruminant 14  
Pig 15  
Llama 16  
Horse 17  
Rhino 18  
Tapir 19  
Cat 20  
Caniform 21  
Pangolin 22  
Sciurid 23  
Mouse 24  
Rat 25  
Hystricid 26  
Caviomorph 27  
Rabbit 28  
Pika 29  
Flying\_Lem 30  
Tree\_Shrew 31  
Strepsirrh 32  
Human 33  
Tenrecid 34  
Golden\_Mol 35  
Sh\_Ear\_Ele 36  
Lo\_Ear\_Ele 37  
Aardvark 38  
Sirenian 39  
Hyrax 40  
Elephant 41

list of child1, child2, ..., parent follows:

39 40 42  
42 41 43  
36 37 44  
34 35 45  
45 44 46  
46 38 47  
47 43 48  
32 33 49  
30 31 50  
50 49 51  
28 29 52  
26 27 53  
24 25 54

54 53 55  
23 55 56  
56 52 57  
57 51 58  
20 21 59  
59 22 60  
18 19 61  
17 61 62  
62 60 63  
11 12 64  
64 13 65  
65 14 66  
66 15 67  
67 16 68  
68 63 69  
9 10 70  
8 70 71  
6 7 72  
72 71 73  
73 69 74  
3 4 75  
75 5 76  
76 74 77  
77 58 78  
0 1 79  
79 2 80  
80 78 81  
81 48 82

### Myomorph root tree

((((((((((Sloth: 0.0576841776,Anteater: 0.0623673367): 0.0094575014,Armadillo:  
0.0570017240): 0.0318469558,(((Tenrecid: 0.1451099373,GoldenMol: 0.0680438388):  
0.0095382004,(Macroscel: 0.0393870556,Elephantu: 0.0365920156): 0.0900654038):  
0.0022390609,Aardvark: 0.0695374588): 0.0032997315,((Sirenian: 0.0385131104,Hyrax:  
0.0907872374): 0.0030352359,Elephant: 0.0513945249): 0.0149443576): 0.0318788752):  
0.0098827889,(((Hedgehog: 0.1389403737,Shrew: 0.1256441311): 0.0123927625,Mole:  
0.0878277261): 0.0122135663,(((Phyllostom: 0.0944533288,Freetaile: 0.0471727795):  
0.0116475720,(Falsevamp: 0.0632953488,(FlyingFox: 0.0188257897,Rousette:  
0.0191315731): 0.0371083577): 0.0049381040): 0.0164825637,((((((Whale:  
0.0140132059,Dolphin: 0.0222384431): 0.0198253268,Hippo: 0.0403690056):  
0.0050460658,Ruminant: 0.0741587013): 0.0085328570,Pig: 0.0681394533):  
0.0060488340,Llama: 0.0626149448): 0.0279028284,((Horse: 0.0442613688,(Rhino:  
0.0290563667,Tapir: 0.0288789649): 0.0052967766): 0.0207640278,((Cat:  
0.0468418562,Caniform: 0.0566256677): 0.0234750060,Pangolin: 0.0766693727):  
0.0039561623): 0.0016878134): 0.0012787676): 0.0023919561): 0.0110763465):

0.0079206949,((FlyingLem: 0.0621588018,TreeShrew: 0.1028689582):  
0.0041591028,(Strepsirrh: 0.0770877568,Human: 0.0659012040): 0.0097311330):  
0.0017377890): 0.0055659757,(Rabbit: 0.0584798027,Pika: 0.1100560429): 0.0448194374):  
0.0109982455,Sciurid: 0.0864314314): 0.0030983670,(Hystricid: 0.0758724565,Caviomorph:  
0.0877775361): 0.0658878795): 0.0060397339,(Mouse: 0.0423255903,Rat: 0.0462682171):  
0.1205176818);

list of names and tip numbers follows:

Sloth 0  
Anteater 1  
Armadillo 2  
Tenrecid 3  
GoldenMol 4  
Macroscel 5  
Elephantu 6  
Aardvark 7  
Sirenian 8  
Hyrax 9  
Elephant 10  
Hedgehog 11  
Shrew 12  
Mole 13  
Phyllostom 14  
Freetaille 15  
Falsevamp 16  
FlyingFox 17  
Rousette 18  
Whale 19  
Dolphin 20  
Hippo 21  
Ruminant 22  
Pig 23  
Llama 24  
Horse 25  
Rhino 26  
Tapir 27  
Cat 28  
Caniform 29  
Pangolin 30  
FlyingLem 31  
TreeShrew 32  
Strepsirrh 33  
Human 34  
Rabbit 35  
Pika 36  
Sciurid 37

Hystrioid 38  
Caviomorph 39  
Mouse 40  
Rat 41

list of child1, child2, ..., parent follows:

40 41 42  
38 39 43  
35 36 44  
33 34 45  
31 32 46  
46 45 47  
28 29 48  
48 30 49  
26 27 50  
25 50 51  
51 49 52  
19 20 53  
53 21 54  
54 22 55  
55 23 56  
56 24 57  
57 52 58  
17 18 59  
16 59 60  
14 15 61  
61 60 62  
62 58 63  
11 12 64  
64 13 65  
65 63 66  
8 9 67  
67 10 68  
5 6 69  
3 4 70  
70 69 71  
71 7 72  
72 68 73  
0 1 74  
74 2 75  
75 73 76  
76 66 77  
77 47 78  
78 44 79  
79 37 80  
80 43 81

81 42 82

**Tree with branch lengths for 16,397-bp data set and “K/T body size” taxa**

(((((Hedgehog: 0.1212738458,Shrew: 0.1083111572): 0.0123676901,Mole: 0.0767055340):  
0.0110419783,((Phyllostom: 0.0836821141,Freetaile: 0.0407215249): 0.0105712353,  
(Falsevamp: 0.0554439077,RousetteF: 0.0487742417): 0.0061916054): 0.0161273796):  
0.0094596501,((Sciurid: 0.0729025963,(Mouse: 0.0384778034,Rat: 0.0423346143):  
0.1088421076): 0.0169243441,(FlyingLem: 0.0568724968,TreeShrew: 0.0901455136):  
0.0054892991): 0.0062728918): 0.0130933320,((Tenrecid: 0.1213646053,GoldenMol:  
0.0647915681): 0.0109750611,(ShEarEle: 0.0340790940,LoEarEle: 0.0339342429):  
0.0770352396): 0.0190706734);

list of names and tip numbers follows:

Hedgehog 0  
Shrew 1  
Mole 2  
Phyllostom 3  
Freetaile 4  
Falsevamp 5  
RousetteF 6  
Sciurid 7  
Mouse 8  
Rat 9  
FlyingLem 10  
TreeShrew 11  
Tenrecid 12  
GoldenMol 13  
ShEarEle 14  
LoEarEle 15

list of child1, child2, ..., parent follows:

14 15 16  
12 13 17  
17 16 18  
10 11 19  
8 9 20  
7 20 21  
21 19 22  
5 6 23  
3 4 24  
24 23 25  
0 1 26  
26 2 27  
27 25 28  
28 22 29

## 2. Divergence Times and 95% Credibility Intervals for Different Analyses:

**Murphy *et al.* (1) tree; 16,397-bp data set; mean value of prior distribution set at 105 million years for the base of crown-group Placentalia; “hopefully good starting state” (2) for Markov chain; all constraints; opossum outgroup**

Actual time node 42 = 59.02304 (SD = 2.44326) ( 53.15753, 62.71712)  
 Actual time node 43 = 62.47270 (SD = 2.13566) ( 56.93826, 64.92474)  
 Actual time node 44 = 18.83750 (SD = 2.32893) ( 14.57595, 23.64882)  
 Actual time node 45 = 66.36406 (SD = 3.26759) ( 59.48388, 72.37778)  
 Actual time node 46 = 74.40048 (SD = 2.99732) ( 68.19455, 80.13478)  
 Actual time node 47 = 76.50247 (SD = 2.95769) ( 70.34769, 82.18859)  
 Actual time node 48 = 79.87990 (SD = 2.96720) ( 73.95456, 85.76950)  
 Actual time node 49 = 77.14804 (SD = 3.32412) ( 70.73690, 83.88918)  
 Actual time node 50 = 82.16058 (SD = 3.21048) ( 76.09035, 88.69107)  
 Actual time node 51 = 85.91763 (SD = 3.14664) ( 80.05815, 92.46869)  
 Actual time node 52 = 50.93437 (SD = 4.02738) ( 42.95254, 58.55707)  
 Actual time node 53 = 38.29035 (SD = 3.94033) ( 30.73488, 46.04394)  
 Actual time node 54 = 16.26369 (SD = 2.20428) ( 12.60509, 21.18303)  
 Actual time node 55 = 70.39824 (SD = 3.44725) ( 63.67762, 77.26271)  
 Actual time node 56 = 73.96173 (SD = 3.31437) ( 67.54102, 80.68910)  
 Actual time node 57 = 82.57642 (SD = 3.15953) ( 76.58101, 89.03784)  
 Actual time node 58 = 87.34830 (SD = 3.15045) ( 81.47352, 93.88392)  
 Actual time node 59 = 55.11207 (SD = 2.54474) ( 50.54202, 60.18002)  
 Actual time node 60 = 76.86864 (SD = 1.93597) ( 73.25095, 80.79214)  
 Actual time node 61 = 48.84498 (SD = 2.00687) ( 44.67740, 52.47400)  
 Actual time node 62 = 56.49179 (SD = 1.06894) ( 54.24970, 57.94802)  
 Actual time node 63 = 80.44364 (SD = 2.03598) ( 76.53664, 84.67371)  
 Actual time node 64 = 29.62189 (SD = 2.09322) ( 25.33682, 33.59109)  
 Actual time node 65 = 52.42555 (SD = 0.39768) ( 52.01085, 53.47692)  
 Actual time node 66 = 55.69769 (SD = 0.71657) ( 54.33053, 57.15122)  
 Actual time node 67 = 60.53857 (SD = 0.84397) ( 58.78932, 62.06522)  
 Actual time node 68 = 63.79277 (SD = 0.83639) ( 61.88937, 64.94540)  
 Actual time node 69 = 82.11502 (SD = 2.15194) ( 77.96865, 86.51092)  
 Actual time node 70 = 19.97421 (SD = 2.55043) ( 15.26201, 25.20981)  
 Actual time node 71 = 58.81118 (SD = 1.11275) ( 55.82249, 59.96860)  
 Actual time node 72 = 53.18433 (SD = 2.30962) ( 48.36350, 57.38287)  
 Actual time node 73 = 65.29363 (SD = 1.39794) ( 62.37260, 67.96871)  
 Actual time node 74 = 83.05883 (SD = 2.26107) ( 78.75139, 87.70116)  
 Actual time node 75 = 68.20530 (SD = 2.58972) ( 63.62805, 73.49147)  
 Actual time node 76 = 75.93472 (SD = 2.26702) ( 71.81796, 80.64748)  
 Actual time node 77 = 85.08075 (SD = 2.52529) ( 80.32926, 90.34545)  
 Actual time node 78 = 94.03171 (SD = 3.43594) ( 87.61081, 101.19990)  
 Actual time node 79 = 62.19264 (SD = 4.56977) ( 52.99846, 70.97034)

Actual time node 80 = 71.40311 (SD = 4.08837) ( 63.28161, 79.31571)  
Actual time node 81 = 101.96012 (SD = 4.33026) ( 93.97155, 111.00536)  
Actual time node 82 = 106.65984 (SD = 4.93492) ( 97.76529, 117.11800)

**Murphy *et al.* (1) tree; 16,397-bp data set; mean value of prior distribution set at 105 million years for the base of crown-group Placentalia; “semi-random guess” (2) to start Markov chain; all constraints; opossum outgroup**

Actual time node 42 = 58.98755 (SD = 2.44161) ( 53.15628, 62.67459)  
Actual time node 43 = 62.44585 (SD = 2.15483) ( 56.91527, 64.93289)  
Actual time node 44 = 18.75516 (SD = 2.33964) ( 14.51291, 23.66672)  
Actual time node 45 = 66.33692 (SD = 3.29986) ( 59.35052, 72.53748)  
Actual time node 46 = 74.40984 (SD = 3.00714) ( 68.06230, 80.13271)  
Actual time node 47 = 76.53694 (SD = 2.96376) ( 70.38627, 82.16807)  
Actual time node 48 = 79.93395 (SD = 2.97849) ( 73.81284, 85.67560)  
Actual time node 49 = 77.22032 (SD = 3.30307) ( 70.90290, 83.82795)  
Actual time node 50 = 82.25236 (SD = 3.19617) ( 76.23304, 88.89465)  
Actual time node 51 = 86.01512 (SD = 3.13791) ( 80.13942, 92.34079)  
Actual time node 52 = 50.93267 (SD = 3.95620) ( 43.03723, 58.49576)  
Actual time node 53 = 38.23319 (SD = 3.90244) ( 30.62994, 46.11109)  
Actual time node 54 = 16.23768 (SD = 2.17306) ( 12.60920, 21.13371)  
Actual time node 55 = 70.44548 (SD = 3.40082) ( 63.78913, 77.14391)  
Actual time node 56 = 74.03444 (SD = 3.26494) ( 67.70224, 80.52521)  
Actual time node 57 = 82.65080 (SD = 3.15516) ( 76.80535, 89.06730)  
Actual time node 58 = 87.44615 (SD = 3.13943) ( 81.56193, 93.79929)  
Actual time node 59 = 55.15028 (SD = 2.58374) ( 50.56913, 60.31791)  
Actual time node 60 = 76.92333 (SD = 1.95545) ( 73.22055, 80.86130)  
Actual time node 61 = 48.85469 (SD = 1.99957) ( 44.66866, 52.44430)  
Actual time node 62 = 56.49677 (SD = 1.06555) ( 54.25973, 57.93977)  
Actual time node 63 = 80.52871 (SD = 2.04328) ( 76.59159, 84.66349)  
Actual time node 64 = 29.61040 (SD = 2.09028) ( 25.39062, 33.58690)  
Actual time node 65 = 52.42836 (SD = 0.40464) ( 52.01224, 53.47720)  
Actual time node 66 = 55.69444 (SD = 0.71162) ( 54.34277, 57.13618)  
Actual time node 67 = 60.52940 (SD = 0.83410) ( 58.80382, 62.02740)  
Actual time node 68 = 63.78283 (SD = 0.83941) ( 61.86227, 64.94468)  
Actual time node 69 = 82.20247 (SD = 2.15156) ( 78.05764, 86.53504)  
Actual time node 70 = 19.86689 (SD = 2.52690) ( 15.06287, 25.07425)  
Actual time node 71 = 58.78080 (SD = 1.16095) ( 55.71049, 59.96907)  
Actual time node 72 = 53.12873 (SD = 2.35030) ( 48.09337, 57.30183)  
Actual time node 73 = 65.29847 (SD = 1.41022) ( 62.32242, 67.95161)  
Actual time node 74 = 83.15135 (SD = 2.25152) ( 78.79653, 87.61375)  
Actual time node 75 = 68.30882 (SD = 2.61794) ( 63.63094, 73.67134)  
Actual time node 76 = 76.03524 (SD = 2.26107) ( 71.94234, 80.69467)  
Actual time node 77 = 85.19189 (SD = 2.50908) ( 80.38290, 90.22523)  
Actual time node 78 = 94.16410 (SD = 3.41494) ( 87.63235, 101.08570)  
Actual time node 79 = 62.33732 (SD = 4.58238) ( 53.00629, 71.11145)



Actual time node 80 = 71.50441 (SD = 4.11338) ( 63.40823, 79.54274)  
Actual time node 81 = 102.12301 (SD = 4.32151) ( 93.99970, 110.99339)  
Actual time node 82 = 106.86703 (SD = 4.95390) ( 97.66477, 117.20814)

**Murphy *et al.* (1) tree; 16,397-bp data set; mean value of prior distribution set at 105 million years for the base of crown-group Placentalia; “hopefully good starting state” (2) for Markov chain; all constraints; diprotodontian outgroup**

Actual time node 42 = 59.03948 (SD = 2.46237) ( 53.15327, 62.73587)  
Actual time node 43 = 62.38710 (SD = 2.17738) ( 56.82564, 64.91664)  
Actual time node 44 = 18.79456 (SD = 2.32461) ( 14.52907, 23.72420)  
Actual time node 45 = 66.33850 (SD = 3.23269) ( 59.66895, 72.29603)  
Actual time node 46 = 74.34706 (SD = 2.96147) ( 68.23739, 79.95168)  
Actual time node 47 = 76.46188 (SD = 2.92160) ( 70.44904, 82.21635)  
Actual time node 48 = 79.76176 (SD = 2.93531) ( 73.82733, 85.55543)  
Actual time node 49 = 77.38765 (SD = 3.27627) ( 71.05147, 83.94959)  
Actual time node 50 = 82.39654 (SD = 3.20864) ( 76.24970, 88.98365)  
Actual time node 51 = 86.15926 (SD = 3.12782) ( 80.37902, 92.51222)  
Actual time node 52 = 51.05515 (SD = 4.06718) ( 42.67798, 58.63079)  
Actual time node 53 = 38.34790 (SD = 3.96874) ( 30.71050, 46.15225)  
Actual time node 54 = 16.29435 (SD = 2.22174) ( 12.62473, 21.09573)  
Actual time node 55 = 70.57863 (SD = 3.44227) ( 63.83831, 77.30906)  
Actual time node 56 = 74.18871 (SD = 3.29744) ( 67.69410, 80.64597)  
Actual time node 57 = 82.83072 (SD = 3.13640) ( 76.90007, 89.18233)  
Actual time node 58 = 87.60579 (SD = 3.12561) ( 81.79252, 93.99543)  
Actual time node 59 = 55.14913 (SD = 2.58637) ( 50.56959, 60.29448)  
Actual time node 60 = 76.96491 (SD = 1.93722) ( 73.31623, 80.87585)  
Actual time node 61 = 48.89215 (SD = 2.00858) ( 44.69115, 52.46708)  
Actual time node 62 = 56.48864 (SD = 1.06803) ( 54.26550, 57.94112)  
Actual time node 63 = 80.56912 (SD = 2.02918) ( 76.75446, 84.74673)  
Actual time node 64 = 29.61754 (SD = 2.09773) ( 25.38987, 33.58403)  
Actual time node 65 = 52.42914 (SD = 0.40133) ( 52.01119, 53.48672)  
Actual time node 66 = 55.72036 (SD = 0.71217) ( 54.34640, 57.13799)  
Actual time node 67 = 60.57660 (SD = 0.82863) ( 58.87037, 62.09737)  
Actual time node 68 = 63.82188 (SD = 0.82298) ( 61.92437, 64.94648)  
Actual time node 69 = 82.25839 (SD = 2.13283) ( 78.23685, 86.56564)  
Actual time node 70 = 19.84149 (SD = 2.53210) ( 15.06444, 25.02434)  
Actual time node 71 = 58.80358 (SD = 1.14735) ( 55.75335, 59.96807)  
Actual time node 72 = 53.15422 (SD = 2.34076) ( 48.23883, 57.29477)  
Actual time node 73 = 65.31286 (SD = 1.41950) ( 62.34003, 68.04582)  
Actual time node 74 = 83.24603 (SD = 2.24014) ( 79.02598, 87.72682)  
Actual time node 75 = 68.37282 (SD = 2.61928) ( 63.71148, 73.72687)  
Actual time node 76 = 76.08390 (SD = 2.28081) ( 71.95939, 80.82278)  
Actual time node 77 = 85.30104 (SD = 2.50439) ( 80.59451, 90.45287)  
Actual time node 78 = 94.33573 (SD = 3.40127) ( 87.89256, 101.32641)  
Actual time node 79 = 62.38784 (SD = 4.49783) ( 53.21348, 71.02684)

Actual time node 80 = 71.53869 (SD = 4.01128) ( 63.60939, 79.39592)  
Actual time node 81 = 102.23665 (SD = 4.30059) ( 94.32337, 111.15607)  
Actual time node 82 = 106.79878 (SD = 4.88881) ( 97.98891, 117.13412)

**Murphy *et al.* (1) tree; 16,397-bp data set; mean value of prior distribution set at 65 million years for the base of crown-group Placentalia; “hopefully good starting state” (2) for Markov chain; all constraints; opossum outgroup**

Actual time node 42 = 59.02289 (SD = 2.45192) ( 53.07309, 62.68680)  
Actual time node 43 = 62.46438 (SD = 2.15350) ( 56.87772, 64.91162)  
Actual time node 44 = 18.85456 (SD = 2.39007) ( 14.46653, 23.92408)  
Actual time node 45 = 66.22229 (SD = 3.25973) ( 59.41118, 72.38493)  
Actual time node 46 = 74.21132 (SD = 2.95193) ( 68.16131, 79.94741)  
Actual time node 47 = 76.29038 (SD = 2.90868) ( 70.34488, 81.91022)  
Actual time node 48 = 79.61032 (SD = 2.89718) ( 73.78423, 85.34846)  
Actual time node 49 = 76.67862 (SD = 3.22671) ( 70.46332, 83.05107)  
Actual time node 50 = 81.60451 (SD = 3.14313) ( 75.65245, 87.92284)  
Actual time node 51 = 85.30407 (SD = 3.05352) ( 79.57080, 91.58954)  
Actual time node 52 = 50.67398 (SD = 4.03734) ( 42.47712, 58.34717)  
Actual time node 53 = 38.15149 (SD = 3.91197) ( 30.77065, 45.91053)  
Actual time node 54 = 16.22410 (SD = 2.18419) ( 12.56038, 20.93806)  
Actual time node 55 = 70.01197 (SD = 3.41648) ( 63.32226, 76.86252)  
Actual time node 56 = 73.53653 (SD = 3.27860) ( 67.08031, 80.08868)  
Actual time node 57 = 82.02748 (SD = 3.10486) ( 76.19158, 88.40342)  
Actual time node 58 = 86.71557 (SD = 3.06192) ( 80.90362, 93.02253)  
Actual time node 59 = 55.12877 (SD = 2.54827) ( 50.58228, 60.20385)  
Actual time node 60 = 76.57099 (SD = 1.91766) ( 72.97173, 80.47323)  
Actual time node 61 = 48.94639 (SD = 1.98224) ( 44.76133, 52.46173)  
Actual time node 62 = 56.50317 (SD = 1.05216) ( 54.28061, 57.94264)  
Actual time node 63 = 80.09534 (SD = 2.01585) ( 76.27475, 84.26140)  
Actual time node 64 = 29.67395 (SD = 2.11771) ( 25.39657, 33.73154)  
Actual time node 65 = 52.43513 (SD = 0.41108) ( 52.01298, 53.54877)  
Actual time node 66 = 55.69154 (SD = 0.70724) ( 54.33040, 57.11190)  
Actual time node 67 = 60.49578 (SD = 0.83930) ( 58.76958, 62.00540)  
Actual time node 68 = 63.72959 (SD = 0.85183) ( 61.81596, 64.93691)  
Actual time node 69 = 81.74002 (SD = 2.13698) ( 77.73521, 86.10894)  
Actual time node 70 = 19.98030 (SD = 2.61948) ( 15.08982, 25.36940)  
Actual time node 71 = 58.76904 (SD = 1.16331) ( 55.71030, 59.96502)  
Actual time node 72 = 53.11850 (SD = 2.36855) ( 48.10644, 57.37082)  
Actual time node 73 = 65.20584 (SD = 1.39581) ( 62.35041, 67.88247)  
Actual time node 74 = 82.65818 (SD = 2.23516) ( 78.44819, 87.18034)  
Actual time node 75 = 68.09450 (SD = 2.56910) ( 63.57874, 73.37003)  
Actual time node 76 = 75.69267 (SD = 2.25527) ( 71.66599, 80.35358)  
Actual time node 77 = 84.61296 (SD = 2.48204) ( 79.96477, 89.67992)  
Actual time node 78 = 93.17821 (SD = 3.33221) ( 86.93527, 99.94019)  
Actual time node 79 = 62.43175 (SD = 4.39044) ( 53.50239, 70.79763)

Actual time node 80 = 71.54243 (SD = 3.89518) ( 63.80425, 79.22589)  
Actual time node 81 = 100.62027 (SD = 4.20091) ( 92.86234, 109.18571)  
Actual time node 82 = 104.97537 (SD = 4.76849) ( 96.28025, 114.91241)

**Murphy *et al.* (1) tree; 16,397-bp data set; mean value of prior distribution set at 146 million years for the base of crown-group Placentalia; “hopefully good starting state” (2) for Markov chain; all constraints; opossum outgroup**

Actual time node 42 = 59.01706 (SD = 2.42262) ( 53.21595, 62.70925)  
Actual time node 43 = 62.46198 (SD = 2.13656) ( 56.99780, 64.91886)  
Actual time node 44 = 18.72596 (SD = 2.30592) ( 14.53693, 23.59164)  
Actual time node 45 = 66.34313 (SD = 3.28022) ( 59.56788, 72.39288)  
Actual time node 46 = 74.47277 (SD = 3.02914) ( 68.21156, 80.20551)  
Actual time node 47 = 76.61749 (SD = 2.99466) ( 70.48473, 82.39516)  
Actual time node 48 = 80.05954 (SD = 3.00263) ( 74.07521, 86.10621)  
Actual time node 49 = 77.44785 (SD = 3.36070) ( 71.05156, 84.29884)  
Actual time node 50 = 82.52344 (SD = 3.25349) ( 76.51398, 89.23348)  
Actual time node 51 = 86.33236 (SD = 3.18037) ( 80.48097, 93.01237)  
Actual time node 52 = 50.97440 (SD = 4.01532) ( 43.13849, 58.66215)  
Actual time node 53 = 38.36251 (SD = 3.90537) ( 30.74948, 45.99465)  
Actual time node 54 = 16.24460 (SD = 2.13210) ( 12.66238, 20.97622)  
Actual time node 55 = 70.61886 (SD = 3.46764) ( 63.90002, 77.40866)  
Actual time node 56 = 74.21799 (SD = 3.32678) ( 67.88076, 80.93509)  
Actual time node 57 = 82.92544 (SD = 3.19477) ( 76.89681, 89.52641)  
Actual time node 58 = 87.78338 (SD = 3.17367) ( 81.94536, 94.48359)  
Actual time node 59 = 55.13740 (SD = 2.57346) ( 50.54124, 60.24838)  
Actual time node 60 = 77.05569 (SD = 1.95601) ( 73.40827, 81.13594)  
Actual time node 61 = 48.82301 (SD = 1.97627) ( 44.66841, 52.39616)  
Actual time node 62 = 56.49412 (SD = 1.05850) ( 54.25302, 57.93531)  
Actual time node 63 = 80.70195 (SD = 2.06965) ( 76.85646, 85.02223)  
Actual time node 64 = 29.56319 (SD = 2.08968) ( 25.28834, 33.46399)  
Actual time node 65 = 52.42835 (SD = 0.40078) ( 52.01190, 53.48405)  
Actual time node 66 = 55.72119 (SD = 0.71837) ( 54.37075, 57.17531)  
Actual time node 67 = 60.57798 (SD = 0.83193) ( 58.84070, 62.10275)  
Actual time node 68 = 63.84109 (SD = 0.82398) ( 61.95273, 64.94742)  
Actual time node 69 = 82.40169 (SD = 2.17205) ( 78.35537, 86.89329)  
Actual time node 70 = 19.92111 (SD = 2.50488) ( 15.29665, 25.12159)  
Actual time node 71 = 58.82515 (SD = 1.11296) ( 55.83681, 59.97026)  
Actual time node 72 = 53.12715 (SD = 2.34555) ( 48.11767, 57.36855)  
Actual time node 73 = 65.31682 (SD = 1.40204) ( 62.42546, 68.00878)  
Actual time node 74 = 83.36853 (SD = 2.27308) ( 79.14124, 88.03810)  
Actual time node 75 = 68.35945 (SD = 2.63696) ( 63.61999, 73.80582)  
Actual time node 76 = 76.16746 (SD = 2.30078) ( 71.98628, 80.95605)  
Actual time node 77 = 85.43834 (SD = 2.53950) ( 80.78510, 90.72023)  
Actual time node 78 = 94.64277 (SD = 3.44781) ( 88.46147, 101.92845)  
Actual time node 79 = 62.02971 (SD = 4.61234) ( 52.81207, 70.92126)

Actual time node 80 = 71.28978 (SD = 4.15910) ( 63.20364, 79.49028)  
Actual time node 81 = 102.97908 (SD = 4.34873) ( 95.19901, 112.13211)  
Actual time node 82 = 108.01677 (SD = 4.97848) ( 99.14509, 118.78128)

**myomorph root tree; 16,397-bp data set; mean value of prior distribution set at 146 million years for the base of crown-group Placentalia; “hopefully good starting state” (2) for Markov chain; all constraints; opossum outgroup**

Actual time node 42 = 34.85927 (SD = 5.14942) ( 25.61845, 45.88475)  
Actual time node 43 = 70.94006 (SD = 7.10491) ( 56.95986, 85.04873)  
Actual time node 44 = 70.69384 (SD = 5.49376) ( 59.64099, 81.45439)  
Actual time node 45 = 94.80215 (SD = 4.69388) ( 86.21206, 104.79292)  
Actual time node 46 = 100.74942 (SD = 4.86312) ( 91.93577, 111.08810)  
Actual time node 47 = 105.26511 (SD = 5.03581) ( 96.16980, 116.10678)  
Actual time node 48 = 55.70312 (SD = 2.80956) ( 50.65196, 61.26311)  
Actual time node 49 = 79.22041 (SD = 2.16283) ( 75.22343, 83.61612)  
Actual time node 50 = 48.61547 (SD = 2.03659) ( 44.30432, 52.24715)  
Actual time node 51 = 56.47263 (SD = 1.07819) ( 54.25321, 57.94640)  
Actual time node 52 = 83.39650 (SD = 2.28762) ( 79.19350, 88.16580)  
Actual time node 53 = 29.45405 (SD = 2.10808) ( 25.20262, 33.47663)  
Actual time node 54 = 52.46103 (SD = 0.42490) ( 52.01153, 53.56697)  
Actual time node 55 = 55.83060 (SD = 0.71544) ( 54.48442, 57.29529)  
Actual time node 56 = 60.79839 (SD = 0.75973) ( 59.19047, 62.19083)  
Actual time node 57 = 64.16775 (SD = 0.66601) ( 62.50871, 64.97053)  
Actual time node 58 = 85.31983 (SD = 2.42498) ( 80.77232, 90.34138)  
Actual time node 59 = 19.31021 (SD = 2.45048) ( 14.71938, 24.36931)  
Actual time node 60 = 58.71352 (SD = 1.23430) ( 55.34928, 59.96648)  
Actual time node 61 = 52.96195 (SD = 2.50018) ( 47.70849, 57.46592)  
Actual time node 62 = 65.81330 (SD = 1.54262) ( 62.62088, 68.75971)  
Actual time node 63 = 86.54550 (SD = 2.58317) ( 81.77718, 91.91744)  
Actual time node 64 = 70.19810 (SD = 3.15660) ( 64.18377, 76.58684)  
Actual time node 65 = 78.59147 (SD = 2.66681) ( 73.74579, 84.18261)  
Actual time node 66 = 89.06138 (SD = 2.92030) ( 83.70000, 95.19439)  
Actual time node 67 = 53.97388 (SD = 2.35163) ( 50.40870, 59.54558)  
Actual time node 68 = 56.86199 (SD = 2.23288) ( 54.09847, 62.44391)  
Actual time node 69 = 17.09945 (SD = 2.05182) ( 13.40015, 21.40247)  
Actual time node 70 = 58.34647 (SD = 2.75216) ( 53.42863, 64.36997)  
Actual time node 71 = 64.75682 (SD = 2.56643) ( 60.51187, 70.54480)  
Actual time node 72 = 66.33043 (SD = 2.53103) ( 62.21749, 72.07829)  
Actual time node 73 = 68.68430 (SD = 2.50791) ( 64.61790, 74.38718)  
Actual time node 74 = 57.13471 (SD = 3.64927) ( 50.75301, 64.71050)  
Actual time node 75 = 65.55613 (SD = 3.26828) ( 60.43692, 72.73434)  
Actual time node 76 = 91.62818 (SD = 3.42020) ( 85.50241, 98.96765)  
Actual time node 77 = 99.64732 (SD = 4.20452) ( 92.00117, 108.64755)  
Actual time node 78 = 107.11541 (SD = 5.14176) ( 97.80406, 118.26486)  
Actual time node 79 = 112.59280 (SD = 5.81285) (102.07313, 125.34286)

Actual time node 80 = 122.98265 (SD = 6.96730) (110.42134, 138.15988)  
Actual time node 81 = 125.85885 (SD = 7.30980) (112.69304, 141.73881)  
Actual time node 82 = 130.98354 (SD = 8.08261) (116.44164, 148.28819)

**Murphy *et al.* (1) tree; 16,397-bp data set; mean value of prior distribution set at 105 million years for the base of crown-group Placentalia; “hopefully good starting state” (2) for Markov chain; all constraints except for minimum and maximum at base of Paenungulata; opossum outgroup**

Actual time node 42 = 68.00473 (SD = 5.46999) ( 57.26122, 79.05528)  
Actual time node 43 = 71.67407 (SD = 5.45070) ( 61.15118, 82.56064)  
Actual time node 44 = 21.70462 (SD = 3.14428) ( 16.07754, 28.30678)  
Actual time node 45 = 74.26377 (SD = 5.43214) ( 63.91249, 85.33749)  
Actual time node 46 = 82.56072 (SD = 5.38437) ( 72.21560, 93.53891)  
Actual time node 47 = 84.63846 (SD = 5.37971) ( 74.34758, 95.69457)  
Actual time node 48 = 87.83074 (SD = 5.34652) ( 77.74425, 98.84785)  
Actual time node 49 = 79.77800 (SD = 3.78770) ( 72.65938, 87.42514)  
Actual time node 50 = 85.02752 (SD = 3.74460) ( 78.10987, 92.76280)  
Actual time node 51 = 88.97096 (SD = 3.71183) ( 82.26670, 96.68592)  
Actual time node 52 = 52.42785 (SD = 4.36037) ( 43.89430, 60.87156)  
Actual time node 53 = 39.33562 (SD = 4.20095) ( 31.15228, 47.57312)  
Actual time node 54 = 16.65393 (SD = 2.27250) ( 12.81601, 21.77063)  
Actual time node 55 = 72.64782 (SD = 3.92072) ( 65.18362, 80.56945)  
Actual time node 56 = 76.38146 (SD = 3.79249) ( 69.36201, 84.08986)  
Actual time node 57 = 85.41851 (SD = 3.70341) ( 78.72821, 93.14229)  
Actual time node 58 = 90.47167 (SD = 3.73144) ( 83.81735, 98.26129)  
Actual time node 59 = 55.43236 (SD = 2.71861) ( 50.56169, 60.87576)  
Actual time node 60 = 78.31975 (SD = 2.15829) ( 74.42562, 82.81233)  
Actual time node 61 = 48.70648 (SD = 2.00468) ( 44.45589, 52.26649)  
Actual time node 62 = 56.47781 (SD = 1.05917) ( 54.25154, 57.94721)  
Actual time node 63 = 82.24841 (SD = 2.29410) ( 78.03048, 87.06075)  
Actual time node 64 = 29.42791 (SD = 2.06989) ( 25.21391, 33.36809)  
Actual time node 65 = 52.43770 (SD = 0.40551) ( 52.01284, 53.51383)  
Actual time node 66 = 55.78292 (SD = 0.71025) ( 54.43573, 57.23482)  
Actual time node 67 = 60.72245 (SD = 0.79138) ( 59.09984, 62.19089)  
Actual time node 68 = 64.04694 (SD = 0.72894) ( 62.31618, 64.96572)  
Actual time node 69 = 84.08931 (SD = 2.43865) ( 79.55768, 89.15230)  
Actual time node 70 = 19.55789 (SD = 2.44136) ( 14.99784, 24.58339)  
Actual time node 71 = 58.78961 (SD = 1.16161) ( 55.64663, 59.96889)  
Actual time node 72 = 53.02198 (SD = 2.39696) ( 47.90499, 57.26536)  
Actual time node 73 = 65.60662 (SD = 1.47364) ( 62.59243, 68.51715)  
Actual time node 74 = 85.16657 (SD = 2.58356) ( 80.41387, 90.54020)  
Actual time node 75 = 69.27292 (SD = 2.94089) ( 63.87920, 75.29877)  
Actual time node 76 = 77.47654 (SD = 2.59298) ( 72.79813, 82.85629)  
Actual time node 77 = 87.49399 (SD = 2.91741) ( 82.14618, 93.58280)  
Actual time node 78 = 97.63509 (SD = 4.09964) ( 90.24470, 106.20923)

Actual time node 79 = 65.21740 (SD = 5.02087) ( 55.30371, 75.06677)  
Actual time node 80 = 74.84185 (SD = 4.69052) ( 65.81310, 84.28293)  
Actual time node 81 = 106.22921 (SD = 5.14413) ( 97.02329, 117.11100)  
Actual time node 82 = 112.09314 (SD = 6.10977) (101.21987, 125.29859)

**Murphy *et al.* (1) tree; 16,397-bp data set; mean value of prior distribution set at 105 million years for the base of crown-group Placentalia<sup>14</sup>; “hopefully good starting state” (2) for Markov chain; all constraints except for feliform-caniform minimum and maximum; opossum outgroup**

Actual time node 42 = 58.98960 (SD = 2.43679) ( 53.17677, 62.67039)  
Actual time node 43 = 62.46360 (SD = 2.14573) ( 56.99194, 64.92669)  
Actual time node 44 = 18.78912 (SD = 2.35641) ( 14.51179, 23.70979)  
Actual time node 45 = 66.37555 (SD = 3.28886) ( 59.44068, 72.50185)  
Actual time node 46 = 74.46506 (SD = 2.99997) ( 68.20983, 80.14618)  
Actual time node 47 = 76.58588 (SD = 2.95747) ( 70.50563, 82.24655)  
Actual time node 48 = 79.98369 (SD = 2.95816) ( 74.03894, 85.66267)  
Actual time node 49 = 77.23921 (SD = 3.32653) ( 70.93449, 83.94446)  
Actual time node 50 = 82.27406 (SD = 3.24575) ( 76.19772, 88.94427)  
Actual time node 51 = 86.03897 (SD = 3.15641) ( 80.21475, 92.61676)  
Actual time node 52 = 50.88088 (SD = 4.10891) ( 42.68856, 58.85803)  
Actual time node 53 = 38.28760 (SD = 3.90120) ( 30.69611, 46.08920)  
Actual time node 54 = 16.25255 (SD = 2.14864) ( 12.65726, 20.97117)  
Actual time node 55 = 70.44672 (SD = 3.46785) ( 63.69899, 77.34542)  
Actual time node 56 = 74.02364 (SD = 3.33342) ( 67.78218, 80.80834)  
Actual time node 57 = 82.66428 (SD = 3.18523) ( 76.78657, 89.23820)  
Actual time node 58 = 87.47373 (SD = 3.16413) ( 81.64050, 94.04643)  
Actual time node 59 = 54.72528 (SD = 3.13956) ( 48.09161, 60.26139)  
Actual time node 60 = 76.86519 (SD = 1.98447) ( 73.07951, 80.84321)  
Actual time node 61 = 48.88136 (SD = 1.99294) ( 44.72726, 52.42603)  
Actual time node 62 = 56.49408 (SD = 1.06957) ( 54.23903, 57.94960)  
Actual time node 63 = 80.53023 (SD = 2.08404) ( 76.56946, 84.75239)  
Actual time node 64 = 29.62249 (SD = 2.07308) ( 25.45341, 33.54110)  
Actual time node 65 = 52.43306 (SD = 0.40070) ( 52.01214, 53.48871)  
Actual time node 66 = 55.70048 (SD = 0.71762) ( 54.37450, 57.18304)  
Actual time node 67 = 60.53550 (SD = 0.83352) ( 58.86170, 62.07545)  
Actual time node 68 = 63.79247 (SD = 0.83273) ( 61.89469, 64.94799)  
Actual time node 69 = 82.21716 (SD = 2.19193) ( 78.02743, 86.61041)  
Actual time node 70 = 19.88120 (SD = 2.62258) ( 15.06240, 25.38065)  
Actual time node 71 = 58.77112 (SD = 1.16833) ( 55.73684, 59.96634)  
Actual time node 72 = 53.08716 (SD = 2.37933) ( 48.04552, 57.36655)  
Actual time node 73 = 65.25867 (SD = 1.41008) ( 62.27653, 67.93064)  
Actual time node 74 = 83.16715 (SD = 2.30258) ( 78.81399, 87.82927)  
Actual time node 75 = 68.31283 (SD = 2.64021) ( 63.63990, 73.74298)  
Actual time node 76 = 76.04868 (SD = 2.31501) ( 71.78297, 80.86275)  
Actual time node 77 = 85.20838 (SD = 2.56158) ( 80.44010, 90.43033)

Actual time node 78 = 94.18354 (SD = 3.44113) ( 87.77352, 101.18942)  
Actual time node 79 = 62.31667 (SD = 4.64282) ( 52.86357, 71.15215)  
Actual time node 80 = 71.53995 (SD = 4.12888) ( 63.18424, 79.73067)  
Actual time node 81 = 102.14292 (SD = 4.34131) ( 94.15098, 111.15515)  
Actual time node 82 = 106.88709 (SD = 4.96886) ( 97.78990, 117.43083)

**Murphy *et al.* (1) tree; 16,397-bp data set; mean value of prior distribution set at 105 million years for the base of crown-group Placentalia; “hopefully good starting state” (2) for Markov chain; all constraints except shrew-hedgehog minimum; opossum outgroup**

Actual time node 42 = 59.04758 (SD = 2.42511) ( 53.16812, 62.73615)  
Actual time node 43 = 62.51332 (SD = 2.11174) ( 56.99307, 64.92551)  
Actual time node 44 = 18.79357 (SD = 2.32737) ( 14.55527, 23.64639)  
Actual time node 45 = 66.38303 (SD = 3.28496) ( 59.54579, 72.56133)  
Actual time node 46 = 74.44417 (SD = 2.98945) ( 68.28081, 80.15309)  
Actual time node 47 = 76.55459 (SD = 2.95372) ( 70.46231, 82.26650)  
Actual time node 48 = 79.92606 (SD = 2.93934) ( 73.92778, 85.67797)  
Actual time node 49 = 77.09322 (SD = 3.28095) ( 70.71642, 83.65213)  
Actual time node 50 = 82.10028 (SD = 3.21903) ( 76.03798, 88.54280)  
Actual time node 51 = 85.86054 (SD = 3.13550) ( 79.99257, 92.21886)  
Actual time node 52 = 50.86772 (SD = 4.05637) ( 42.80239, 58.56463)  
Actual time node 53 = 38.19262 (SD = 3.92216) ( 30.70179, 45.94013)  
Actual time node 54 = 16.24318 (SD = 2.17560) ( 12.62996, 21.09863)  
Actual time node 55 = 70.33695 (SD = 3.45522) ( 63.65166, 77.16821)  
Actual time node 56 = 73.90357 (SD = 3.30256) ( 67.59193, 80.56049)  
Actual time node 57 = 82.52257 (SD = 3.16616) ( 76.42913, 88.91139)  
Actual time node 58 = 87.29741 (SD = 3.14537) ( 81.47504, 93.74667)  
Actual time node 59 = 55.10928 (SD = 2.53099) ( 50.53678, 60.10033)  
Actual time node 60 = 76.81585 (SD = 1.96510) ( 73.10769, 80.81092)  
Actual time node 61 = 48.86371 (SD = 2.00625) ( 44.68344, 52.41483)  
Actual time node 62 = 56.47472 (SD = 1.06972) ( 54.26226, 57.94812)  
Actual time node 63 = 80.38693 (SD = 2.07415) ( 76.42781, 84.57284)  
Actual time node 64 = 29.61552 (SD = 2.06498) ( 25.39653, 33.59017)  
Actual time node 65 = 52.42669 (SD = 0.40153) ( 52.01033, 53.49784)  
Actual time node 66 = 55.69238 (SD = 0.71812) ( 54.33700, 57.14614)  
Actual time node 67 = 60.51416 (SD = 0.84034) ( 58.79976, 62.06846)  
Actual time node 68 = 63.77349 (SD = 0.85102) ( 61.83532, 64.94794)  
Actual time node 69 = 82.05524 (SD = 2.18043) ( 77.94040, 86.48564)  
Actual time node 70 = 19.96229 (SD = 2.55481) ( 15.30524, 25.29182)  
Actual time node 71 = 58.81258 (SD = 1.12886) ( 55.78154, 59.96593)  
Actual time node 72 = 53.12055 (SD = 2.30346) ( 48.25031, 57.31126)  
Actual time node 73 = 65.24946 (SD = 1.40131) ( 62.38379, 67.94302)  
Actual time node 74 = 82.99942 (SD = 2.28143) ( 78.69359, 87.57619)  
Actual time node 75 = 67.95848 (SD = 2.98088) ( 61.81746, 73.53408)  
Actual time node 76 = 75.80713 (SD = 2.40908) ( 71.20687, 80.75689)  
Actual time node 77 = 85.01896 (SD = 2.53734) ( 80.22492, 90.15595)

Actual time node 78 = 93.98593 (SD = 3.40407) ( 87.65342, 101.06856)  
Actual time node 79 = 62.19564 (SD = 4.52124) ( 52.80477, 70.78893)  
Actual time node 80 = 71.40133 (SD = 4.06486) ( 63.25766, 79.45419)  
Actual time node 81 = 101.92719 (SD = 4.25955) ( 94.07746, 110.76904)  
Actual time node 82 = 106.65481 (SD = 4.86160) ( 97.81532, 116.89446)

**Murphy *et al.* (1) tree; 16,397-bp data set; mean value of prior distribution set at 105 million years for the base of crown-group Placentalia; “hopefully good starting state” (2) for Markov chain; all constraints except hippo-Cetacea minimum and base of Cetartiodactyla maximum; opossum outgroup**

Actual time node 42 = 58.64571 (SD = 2.48715) ( 52.91376, 62.56280)  
Actual time node 43 = 61.96822 (SD = 2.29503) ( 56.38512, 64.88166)  
Actual time node 44 = 18.41902 (SD = 2.02818) ( 14.65650, 22.64060)  
Actual time node 45 = 65.05158 (SD = 3.06269) ( 58.69934, 70.68065)  
Actual time node 46 = 72.75625 (SD = 2.86498) ( 66.78519, 78.16200)  
Actual time node 47 = 74.71672 (SD = 2.83442) ( 68.80375, 80.09553)  
Actual time node 48 = 77.75422 (SD = 2.82336) ( 71.89601, 83.09721)  
Actual time node 49 = 72.80343 (SD = 2.92125) ( 67.21037, 78.70705)  
Actual time node 50 = 77.70723 (SD = 2.85821) ( 72.29229, 83.54725)  
Actual time node 51 = 81.34512 (SD = 2.77615) ( 76.20445, 87.05401)  
Actual time node 52 = 47.81164 (SD = 3.35306) ( 41.07994, 54.38338)  
Actual time node 53 = 35.63012 (SD = 3.13770) ( 29.50729, 41.88611)  
Actual time node 54 = 15.04287 (SD = 1.64745) ( 12.35316, 18.68392)  
Actual time node 55 = 66.48466 (SD = 2.97064) ( 60.65498, 72.44953)  
Actual time node 56 = 69.90456 (SD = 2.86575) ( 64.44496, 75.66243)  
Actual time node 57 = 78.15552 (SD = 2.78726) ( 72.97909, 83.81410)  
Actual time node 58 = 82.74036 (SD = 2.78030) ( 77.63067, 88.40568)  
Actual time node 59 = 52.68890 (SD = 1.77887) ( 50.13810, 56.68487)  
Actual time node 60 = 72.82123 (SD = 1.84577) ( 69.43270, 76.68150)  
Actual time node 61 = 48.49644 (SD = 1.77765) ( 44.95935, 51.91411)  
Actual time node 62 = 55.67433 (SD = 1.08471) ( 54.08352, 57.80656)  
Actual time node 63 = 76.08183 (SD = 1.93696) ( 72.57628, 80.08732)  
Actual time node 64 = 20.31176 (SD = 2.34322) ( 15.91733, 25.21121)  
Actual time node 65 = 39.84345 (SD = 2.67331) ( 34.57921, 45.08404)  
Actual time node 66 = 44.10212 (SD = 2.64414) ( 38.85713, 49.26468)  
Actual time node 67 = 50.67798 (SD = 2.48096) ( 45.78023, 55.49247)  
Actual time node 68 = 55.26946 (SD = 2.25696) ( 50.86076, 59.73610)  
Actual time node 69 = 77.48199 (SD = 2.01830) ( 73.82978, 81.67507)  
Actual time node 70 = 21.07321 (SD = 2.45640) ( 16.52288, 26.20648)  
Actual time node 71 = 58.29498 (SD = 1.39741) ( 54.79673, 59.93595)  
Actual time node 72 = 52.64962 (SD = 2.13358) ( 47.96080, 56.50367)  
Actual time node 73 = 63.30538 (SD = 1.45895) ( 60.11312, 65.92650)  
Actual time node 74 = 78.48414 (SD = 2.07025) ( 74.76198, 82.70462)  
Actual time node 75 = 65.14877 (SD = 1.63965) ( 63.09354, 69.07701)  
Actual time node 76 = 72.11234 (SD = 1.84021) ( 68.90160, 76.12242)



Actual time node 77 = 80.51403 (SD = 2.24113) ( 76.48304, 85.16758)  
Actual time node 78 = 89.18261 (SD = 2.98288) ( 83.72938, 95.40889)  
Actual time node 79 = 58.69936 (SD = 3.76694) ( 51.44139, 66.05546)  
Actual time node 80 = 67.62931 (SD = 3.39873) ( 61.25015, 74.51704)  
Actual time node 81 = 96.90881 (SD = 3.75001) ( 90.05007, 104.76628)  
Actual time node 82 = 101.76534 (SD = 4.28988) ( 93.95645, 110.81821)

**Murphy *et al.* (1) tree; 16,397-bp data set; mean value of prior distribution set at 105 million years for the base of crown-group Placentalia; “hopefully good starting state” (2) for Markov chain; all constraints except minimum and maximum for base of Perissodactyla; opossum outgroup**

Actual time node 42 = 58.98234 (SD = 2.44648) ( 53.08788, 62.71803)  
Actual time node 43 = 62.45983 (SD = 2.15164) ( 56.80983, 64.92968)  
Actual time node 44 = 18.77928 (SD = 2.36350) ( 14.46539, 23.67860)  
Actual time node 45 = 66.35708 (SD = 3.33408) ( 59.27711, 72.49070)  
Actual time node 46 = 74.45473 (SD = 3.02505) ( 68.11494, 80.18869)  
Actual time node 47 = 76.57917 (SD = 2.97006) ( 70.43336, 82.34422)  
Actual time node 48 = 79.97909 (SD = 2.96444) ( 73.98955, 85.84718)  
Actual time node 49 = 77.40477 (SD = 3.32916) ( 70.97532, 84.15847)  
Actual time node 50 = 82.42050 (SD = 3.22482) ( 76.25148, 88.98796)  
Actual time node 51 = 86.20025 (SD = 3.13364) ( 80.43161, 92.79845)  
Actual time node 52 = 51.00936 (SD = 4.10925) ( 42.60236, 58.85719)  
Actual time node 53 = 38.51957 (SD = 3.92208) ( 30.91472, 46.30346)  
Actual time node 54 = 16.31727 (SD = 2.19630) ( 12.60757, 21.14801)  
Actual time node 55 = 70.64932 (SD = 3.43046) ( 64.07515, 77.55359)  
Actual time node 56 = 74.21407 (SD = 3.30126) ( 67.83957, 80.86973)  
Actual time node 57 = 82.84933 (SD = 3.15651) ( 77.00446, 89.35138)  
Actual time node 58 = 87.64146 (SD = 3.13004) ( 81.95593, 94.19990)  
Actual time node 59 = 56.07940 (SD = 2.75984) ( 50.79322, 61.31078)  
Actual time node 60 = 77.58797 (SD = 2.06851) ( 73.68652, 81.80746)  
Actual time node 61 = 51.83922 (SD = 3.38018) ( 44.73604, 57.99337)  
Actual time node 62 = 59.30981 (SD = 2.84398) ( 53.40323, 64.54333)  
Actual time node 63 = 81.03318 (SD = 2.13697) ( 77.00638, 85.48922)  
Actual time node 64 = 29.61349 (SD = 2.08600) ( 25.37819, 33.54449)  
Actual time node 65 = 52.44553 (SD = 0.41457) ( 52.01028, 53.55418)  
Actual time node 66 = 55.75503 (SD = 0.71292) ( 54.40299, 57.19226)  
Actual time node 67 = 60.64460 (SD = 0.81186) ( 58.97356, 62.12750)  
Actual time node 68 = 63.93581 (SD = 0.78846) ( 62.09093, 64.96073)  
Actual time node 69 = 82.55770 (SD = 2.21073) ( 78.40242, 87.19104)  
Actual time node 70 = 19.80631 (SD = 2.54462) ( 15.12582, 25.08184)  
Actual time node 71 = 58.87664 (SD = 1.06867) ( 55.96533, 59.97001)  
Actual time node 72 = 53.23464 (SD = 2.36457) ( 48.15547, 57.41475)  
Actual time node 73 = 65.59655 (SD = 1.41985) ( 62.72478, 68.36897)  
Actual time node 74 = 83.49558 (SD = 2.30840) ( 79.14301, 88.35635)  
Actual time node 75 = 68.69525 (SD = 2.69794) ( 63.75678, 74.22415)

Actual time node 76 = 76.41686 (SD = 2.34577) ( 72.14734, 81.37891)  
Actual time node 77 = 85.48882 (SD = 2.55504) ( 80.74827, 90.88655)  
Actual time node 78 = 94.32352 (SD = 3.42572) ( 88.13525, 101.61541)  
Actual time node 79 = 62.27468 (SD = 4.57390) ( 52.87681, 70.95639)  
Actual time node 80 = 71.52734 (SD = 4.08061) ( 63.34236, 79.62173)  
Actual time node 81 = 102.24474 (SD = 4.35600) ( 94.48306, 111.61900)  
Actual time node 82 = 106.95240 (SD = 5.00157) ( 98.07657, 117.64355)

**Murphy *et al.* (1) tree; 16,397-bp data set; mean value of prior distribution set at 105 million years for the base of crown-group Placentalia; “hopefully good starting state” (2) for Markov chain; all constraints except for those within Chiroptera; opossum outgroup**

Actual time node 42 = 59.23250 (SD = 2.31872) ( 53.62231, 62.82891)  
Actual time node 43 = 62.73532 (SD = 1.99032) ( 57.55509, 64.92883)  
Actual time node 44 = 18.80656 (SD = 2.21524) ( 14.72926, 23.42535)  
Actual time node 45 = 66.80597 (SD = 3.24492) ( 59.98699, 72.95865)  
Actual time node 46 = 75.08150 (SD = 2.98346) ( 68.83482, 80.74932)  
Actual time node 47 = 77.24983 (SD = 2.95230) ( 71.19945, 82.89344)  
Actual time node 48 = 80.72396 (SD = 2.95290) ( 74.82622, 86.48535)  
Actual time node 49 = 78.48608 (SD = 3.33327) ( 72.02820, 85.14262)  
Actual time node 50 = 83.61796 (SD = 3.26332) ( 77.43453, 90.23220)  
Actual time node 51 = 87.48940 (SD = 3.19104) ( 81.50744, 93.98684)  
Actual time node 52 = 51.75940 (SD = 4.00676) ( 43.74991, 59.50479)  
Actual time node 53 = 38.87073 (SD = 3.85173) ( 31.37619, 46.57865)  
Actual time node 54 = 16.46434 (SD = 2.16218) ( 12.79966, 21.16546)  
Actual time node 55 = 71.67475 (SD = 3.43406) ( 65.19501, 78.50607)  
Actual time node 56 = 75.31794 (SD = 3.31512) ( 68.95898, 81.95447)  
Actual time node 57 = 84.08404 (SD = 3.20881) ( 78.01575, 90.62970)  
Actual time node 58 = 88.95031 (SD = 3.20301) ( 82.99010, 95.43002)  
Actual time node 59 = 55.86181 (SD = 2.70453) ( 50.77401, 61.07290)  
Actual time node 60 = 78.41201 (SD = 2.08777) ( 74.48673, 82.73896)  
Actual time node 61 = 48.75279 (SD = 1.98954) ( 44.57535, 52.34777)  
Actual time node 62 = 56.65915 (SD = 1.01934) ( 54.36997, 57.95196)  
Actual time node 63 = 82.10537 (SD = 2.17104) ( 78.03895, 86.57095)  
Actual time node 64 = 29.32979 (SD = 2.06703) ( 25.14448, 33.26518)  
Actual time node 65 = 52.44121 (SD = 0.41350) ( 52.01222, 53.52575)  
Actual time node 66 = 55.80924 (SD = 0.71544) ( 54.43236, 57.23572)  
Actual time node 67 = 60.80991 (SD = 0.76801) ( 59.20713, 62.22014)  
Actual time node 68 = 64.16719 (SD = 0.67002) ( 62.52476, 64.96781)  
Actual time node 69 = 83.84447 (SD = 2.27364) ( 79.51656, 88.50956)  
Actual time node 70 = 25.28160 (SD = 3.71260) ( 18.51397, 32.98464)  
Actual time node 71 = 65.43120 (SD = 2.69339) ( 60.09126, 70.60231)  
Actual time node 72 = 59.11950 (SD = 3.07894) ( 52.78988, 64.83060)  
Actual time node 73 = 70.14107 (SD = 2.34896) ( 65.60796, 74.78236)  
Actual time node 74 = 84.88036 (SD = 2.39427) ( 80.34373, 89.82168)  
Actual time node 75 = 69.70396 (SD = 2.82156) ( 64.33275, 75.30591)

Actual time node 76 = 77.66566 (SD = 2.45055) ( 73.13103, 82.68557)  
Actual time node 77 = 86.83171 (SD = 2.61090) ( 81.85770, 92.21214)  
Actual time node 78 = 95.71587 (SD = 3.46191) ( 89.29430, 102.85866)  
Actual time node 79 = 63.05764 (SD = 4.55519) ( 53.58746, 71.59940)  
Actual time node 80 = 72.47070 (SD = 4.09454) ( 64.10897, 80.40829)  
Actual time node 81 = 103.73076 (SD = 4.34904) ( 95.62037, 112.73834)  
Actual time node 82 = 108.41107 (SD = 4.92849) ( 99.34870, 118.72274)

**Murphy *et al.* (1) tree; nuclear genes only; mean value of prior distribution set at 105 million years for the base of crown-group Placentalia; “hopefully good starting state” (2) for Markov chain; all constraints; opossum outgroup**

Actual time node 42 = 59.51501 (SD = 2.46142) ( 53.62368, 63.24012)  
Actual time node 43 = 62.35734 (SD = 2.20125) ( 56.78984, 64.92398)  
Actual time node 44 = 17.09026 (SD = 2.24617) ( 13.03184, 21.82528)  
Actual time node 45 = 66.73571 (SD = 3.33778) ( 59.82165, 72.97510)  
Actual time node 46 = 74.13232 (SD = 3.04118) ( 67.92789, 79.94843)  
Actual time node 47 = 76.71098 (SD = 3.00675) ( 70.57258, 82.46465)  
Actual time node 48 = 79.40506 (SD = 3.02550) ( 73.27174, 85.31912)  
Actual time node 49 = 77.24846 (SD = 3.39342) ( 70.78813, 84.35221)  
Actual time node 50 = 84.37006 (SD = 3.30424) ( 78.14824, 91.30455)  
Actual time node 51 = 86.77843 (SD = 3.24475) ( 80.83181, 93.59547)  
Actual time node 52 = 50.18318 (SD = 4.13376) ( 41.88645, 58.29530)  
Actual time node 53 = 37.40783 (SD = 4.00181) ( 29.61758, 45.35983)  
Actual time node 54 = 15.89117 (SD = 2.16290) ( 12.43676, 20.76853)  
Actual time node 55 = 70.50444 (SD = 3.55016) ( 63.63621, 77.63705)  
Actual time node 56 = 73.90075 (SD = 3.41482) ( 67.28436, 80.87473)  
Actual time node 57 = 83.08504 (SD = 3.26478) ( 76.97733, 89.82484)  
Actual time node 58 = 87.78826 (SD = 3.25113) ( 81.86361, 94.66517)  
Actual time node 59 = 55.54069 (SD = 2.71247) ( 50.65855, 60.88893)  
Actual time node 60 = 77.26175 (SD = 2.01769) ( 73.42655, 81.45144)  
Actual time node 61 = 49.55746 (SD = 1.98634) ( 45.37080, 53.11027)  
Actual time node 62 = 56.48835 (SD = 1.06079) ( 54.24523, 57.94223)  
Actual time node 63 = 80.98442 (SD = 2.11958) ( 77.05503, 85.38660)  
Actual time node 64 = 29.84717 (SD = 2.18206) ( 25.39179, 34.04242)  
Actual time node 65 = 52.44177 (SD = 0.41349) ( 52.01155, 53.54034)  
Actual time node 66 = 55.62077 (SD = 0.73128) ( 54.25167, 57.10585)  
Actual time node 67 = 60.61748 (SD = 0.83527) ( 58.90145, 62.19118)  
Actual time node 68 = 63.83278 (SD = 0.81580) ( 61.99274, 64.94863)  
Actual time node 69 = 82.52870 (SD = 2.21358) ( 78.41367, 87.07600)  
Actual time node 70 = 18.58814 (SD = 2.55028) ( 13.91602, 23.97799)  
Actual time node 71 = 58.72291 (SD = 1.18797) ( 55.62633, 59.96548)  
Actual time node 72 = 52.75671 (SD = 2.40521) ( 47.57208, 57.06885)  
Actual time node 73 = 64.85607 (SD = 1.43070) ( 61.86517, 67.54994)  
Actual time node 74 = 83.45649 (SD = 2.31982) ( 79.14399, 88.26063)  
Actual time node 75 = 68.12961 (SD = 2.65827) ( 63.52840, 73.55305)

Actual time node 76 = 76.00244 (SD = 2.34346) ( 71.70764, 80.95286)  
Actual time node 77 = 85.27591 (SD = 2.57276) ( 80.55099, 90.71475)  
Actual time node 78 = 94.74090 (SD = 3.54954) ( 88.39148, 102.15290)  
Actual time node 79 = 61.39612 (SD = 4.63176) ( 52.28342, 70.26401)  
Actual time node 80 = 69.92523 (SD = 4.18313) ( 61.86822, 78.18231)  
Actual time node 81 = 102.71424 (SD = 4.47777) ( 94.66012, 112.31458)  
Actual time node 82 = 107.47852 (SD = 5.14011) ( 98.36027, 118.75427)

**Murphy *et al.* (1) tree; 1<sup>st</sup> + 2<sup>nd</sup> codon positions; mean value of prior distribution set at 105 million years for the base of crown-group Placentalia; “hopefully good starting state” (2) for Markov chain; all constraints; opossum outgroup**

Actual time node 42 = 58.49939 (SD = 3.02862) ( 52.05437, 63.49356)  
Actual time node 43 = 61.19105 (SD = 2.68949) ( 55.18004, 64.84766)  
Actual time node 44 = 18.38448 (SD = 2.72691) ( 13.47568, 24.07465)  
Actual time node 45 = 60.30225 (SD = 3.98153) ( 52.22498, 67.84437)  
Actual time node 46 = 70.50840 (SD = 3.59134) ( 63.36698, 77.36773)  
Actual time node 47 = 73.05361 (SD = 3.47140) ( 66.03656, 79.75570)  
Actual time node 48 = 75.96105 (SD = 3.38923) ( 69.19470, 82.53244)  
Actual time node 49 = 74.29985 (SD = 3.73342) ( 67.17061, 81.86531)  
Actual time node 50 = 83.69013 (SD = 3.35097) ( 77.47516, 90.67754)  
Actual time node 51 = 84.00007 (SD = 3.35383) ( 77.81249, 91.02861)  
Actual time node 52 = 47.65042 (SD = 4.28517) ( 39.23410, 56.11377)  
Actual time node 53 = 35.65725 (SD = 3.93793) ( 28.32178, 43.63833)  
Actual time node 54 = 15.16638 (SD = 2.03771) ( 12.20607, 19.85247)  
Actual time node 55 = 67.07394 (SD = 3.73109) ( 59.93486, 74.54985)  
Actual time node 56 = 71.77015 (SD = 3.54383) ( 65.03371, 78.98200)  
Actual time node 57 = 80.94239 (SD = 3.41297) ( 74.59647, 88.02873)  
Actual time node 58 = 85.24606 (SD = 3.35570) ( 79.03344, 92.31268)  
Actual time node 59 = 55.63844 (SD = 2.82001) ( 50.63990, 61.35952)  
Actual time node 60 = 75.45785 (SD = 2.27865) ( 71.22341, 80.09744)  
Actual time node 61 = 50.42321 (SD = 2.45708) ( 45.32813, 54.95182)  
Actual time node 62 = 56.50702 (SD = 1.06933) ( 54.26641, 57.94491)  
Actual time node 63 = 78.83981 (SD = 2.19464) ( 74.81421, 83.36240)  
Actual time node 64 = 29.18258 (SD = 2.70165) ( 23.86439, 34.41256)  
Actual time node 65 = 52.72165 (SD = 0.65810) ( 52.02152, 54.45048)  
Actual time node 66 = 54.24755 (SD = 1.01120) ( 52.49616, 56.44040)  
Actual time node 67 = 59.74490 (SD = 1.30392) ( 57.19449, 62.25114)  
Actual time node 68 = 63.05507 (SD = 1.23882) ( 60.28167, 64.89223)  
Actual time node 69 = 79.12542 (SD = 2.21498) ( 75.02058, 83.69194)  
Actual time node 70 = 17.76521 (SD = 2.77010) ( 12.75178, 23.53706)  
Actual time node 71 = 58.58084 (SD = 1.26727) ( 55.32712, 59.95861)  
Actual time node 72 = 51.00612 (SD = 2.77083) ( 45.23208, 56.18392)  
Actual time node 73 = 62.18004 (SD = 1.55973) ( 58.81736, 65.06124)  
Actual time node 74 = 80.20489 (SD = 2.29728) ( 75.96601, 84.91272)  
Actual time node 75 = 65.81384 (SD = 2.09385) ( 63.11134, 70.80011)

Actual time node 76 = 70.54739 (SD = 2.24406) ( 66.68897, 75.38484)  
Actual time node 77 = 82.49090 (SD = 2.56471) ( 77.83319, 87.77124)  
Actual time node 78 = 90.54669 (SD = 3.41560) ( 84.34223, 97.71485)  
Actual time node 79 = 60.91880 (SD = 4.33101) ( 53.41457, 70.05913)  
Actual time node 80 = 66.75961 (SD = 3.95573) ( 60.50907, 75.49353)  
Actual time node 81 = 100.19321 (SD = 4.53907) ( 92.13492, 109.78932)  
Actual time node 82 = 102.50371 (SD = 4.86995) ( 93.80705, 113.06121)

**Murphy *et al.* (1) tree; 3rd codon positions; mean value of prior distribution set at 105 million years for the base of crown-group Placentalia; “hopefully good starting state” (2) for Markov chain; all constraints; opossum outgroup**

Actual time node 42 = 58.05671 (SD = 3.02257) ( 51.36279, 62.96490)  
Actual time node 43 = 61.70444 (SD = 2.58703) ( 55.42909, 64.88696)  
Actual time node 44 = 16.12953 (SD = 2.31960) ( 12.07307, 21.22968)  
Actual time node 45 = 71.67654 (SD = 4.26850) ( 63.21062, 80.03279)  
Actual time node 46 = 77.47108 (SD = 3.93737) ( 69.61817, 85.33583)  
Actual time node 47 = 78.96893 (SD = 3.94412) ( 71.07828, 86.95004)  
Actual time node 48 = 80.42387 (SD = 3.91816) ( 72.68042, 88.19869)  
Actual time node 49 = 79.59403 (SD = 4.27955) ( 71.54273, 88.19880)  
Actual time node 50 = 84.90947 (SD = 4.21202) ( 76.96152, 93.45514)  
Actual time node 51 = 88.79143 (SD = 4.02710) ( 81.36674, 97.12982)  
Actual time node 52 = 54.65990 (SD = 4.85332) ( 44.89386, 63.94782)  
Actual time node 53 = 36.50232 (SD = 4.35877) ( 28.18917, 45.31255)  
Actual time node 54 = 16.82590 (SD = 2.42135) ( 12.74343, 22.13406)  
Actual time node 55 = 74.49217 (SD = 4.28956) ( 66.21144, 83.02505)  
Actual time node 56 = 76.49311 (SD = 4.17600) ( 68.47081, 84.95077)  
Actual time node 57 = 85.32215 (SD = 4.07638) ( 77.66732, 93.59684)  
Actual time node 58 = 90.23890 (SD = 4.04184) ( 82.78292, 98.65829)  
Actual time node 59 = 55.69698 (SD = 2.93983) ( 50.50029, 61.51188)  
Actual time node 60 = 79.32558 (SD = 2.65690) ( 74.38563, 84.75015)  
Actual time node 61 = 48.38439 (SD = 2.48121) ( 43.23308, 52.99229)  
Actual time node 62 = 56.15972 (SD = 1.13099) ( 54.13018, 57.91574)  
Actual time node 63 = 82.05439 (SD = 2.62049) ( 77.28260, 87.49610)  
Actual time node 64 = 31.55428 (SD = 2.73432) ( 26.13205, 36.79200)  
Actual time node 65 = 52.52568 (SD = 0.49271) ( 52.01487, 53.85336)  
Actual time node 66 = 56.67690 (SD = 1.06252) ( 54.62757, 58.77603)  
Actual time node 67 = 60.70811 (SD = 1.12656) ( 58.40782, 62.85528)  
Actual time node 68 = 63.80173 (SD = 0.93227) ( 61.54772, 64.95278)  
Actual time node 69 = 84.93503 (SD = 2.78660) ( 79.75260, 90.70149)  
Actual time node 70 = 19.43262 (SD = 2.96706) ( 14.07952, 25.59641)  
Actual time node 71 = 58.54608 (SD = 1.37600) ( 54.88715, 59.95953)  
Actual time node 72 = 55.00838 (SD = 3.35687) ( 48.02038, 61.37951)  
Actual time node 73 = 68.72114 (SD = 2.12690) ( 64.59712, 73.01055)  
Actual time node 74 = 85.63428 (SD = 2.86629) ( 80.28963, 91.58190)  
Actual time node 75 = 69.67436 (SD = 3.38067) ( 63.75905, 76.60991)

Actual time node 76 = 80.52319 (SD = 2.97471) ( 75.13073, 86.80437)  
Actual time node 77 = 86.97081 (SD = 3.08048) ( 81.23523, 93.45497)  
Actual time node 78 = 98.18453 (SD = 4.32905) ( 90.18486, 107.47860)  
Actual time node 79 = 59.33133 (SD = 5.43083) ( 48.73177, 69.96840)  
Actual time node 80 = 71.15819 (SD = 4.88991) ( 62.10666, 81.05503)  
Actual time node 81 = 103.44878 (SD = 4.96674) ( 94.42564, 114.02667)  
Actual time node 82 = 109.07171 (SD = 5.58761) ( 99.06650, 120.84176)

**Murphy *et al.* (1) tree; exons only; mean value of prior distribution set at 105 million years for the base of crown-group Placentalia; “hopefully good starting state” (2) for Markov chain; all constraints; opossum outgroup**

Actual time node 42 = 58.55938 (SD = 2.74761) ( 52.26974, 62.76528)  
Actual time node 43 = 61.87552 (SD = 2.48328) ( 55.76631, 64.89130)  
Actual time node 44 = 17.03463 (SD = 2.32482) ( 12.86639, 21.90956)  
Actual time node 45 = 65.97513 (SD = 3.61145) ( 58.46504, 72.59570)  
Actual time node 46 = 74.24436 (SD = 3.29983) ( 67.37147, 80.42628)  
Actual time node 47 = 76.19752 (SD = 3.26474) ( 69.35256, 82.41448)  
Actual time node 48 = 78.77827 (SD = 3.26317) ( 71.95734, 85.03235)  
Actual time node 49 = 78.22164 (SD = 3.66479) ( 71.34697, 85.81315)  
Actual time node 50 = 85.56825 (SD = 3.57606) ( 78.92005, 92.98480)  
Actual time node 51 = 87.54254 (SD = 3.51634) ( 81.08650, 94.82201)  
Actual time node 52 = 51.54401 (SD = 4.36675) ( 43.10348, 60.00850)  
Actual time node 53 = 36.60124 (SD = 4.07418) ( 28.87169, 44.72753)  
Actual time node 54 = 16.30502 (SD = 2.31432) ( 12.52541, 21.43002)  
Actual time node 55 = 71.21246 (SD = 3.84161) ( 63.77195, 78.87582)  
Actual time node 56 = 74.58432 (SD = 3.69507) ( 67.44472, 81.94146)  
Actual time node 57 = 83.66016 (SD = 3.53825) ( 77.03944, 90.96859)  
Actual time node 58 = 88.58270 (SD = 3.52225) ( 82.13142, 95.85474)  
Actual time node 59 = 55.48477 (SD = 2.70063) ( 50.55864, 60.86424)  
Actual time node 60 = 77.72241 (SD = 2.15070) ( 73.64263, 82.09601)  
Actual time node 61 = 48.89659 (SD = 2.12167) ( 44.52759, 52.71711)  
Actual time node 62 = 56.45435 (SD = 1.08124) ( 54.21499, 57.94432)  
Actual time node 63 = 80.96126 (SD = 2.21585) ( 76.76934, 85.44691)  
Actual time node 64 = 30.98683 (SD = 2.21579) ( 26.54698, 35.19852)  
Actual time node 65 = 52.45491 (SD = 0.42272) ( 52.01187, 53.56977)  
Actual time node 66 = 55.67896 (SD = 0.77745) ( 54.19070, 57.22110)  
Actual time node 67 = 60.51554 (SD = 0.88467) ( 58.68514, 62.13904)  
Actual time node 68 = 63.81266 (SD = 0.85052) ( 61.84824, 64.94989)  
Actual time node 69 = 82.74742 (SD = 2.33228) ( 78.37276, 87.44989)  
Actual time node 70 = 18.11070 (SD = 2.47543) ( 13.56285, 23.17781)  
Actual time node 71 = 58.77755 (SD = 1.16266) ( 55.65849, 59.96756)  
Actual time node 72 = 52.44684 (SD = 2.56583) ( 47.03341, 57.15897)  
Actual time node 73 = 65.50231 (SD = 1.52260) ( 62.40881, 68.42029)  
Actual time node 74 = 83.78890 (SD = 2.45428) ( 79.23847, 88.85087)  
Actual time node 75 = 68.36828 (SD = 2.80861) ( 63.50890, 74.15737)

Actual time node 76 = 76.25496 (SD = 2.45509) ( 71.81246, 81.41625)  
Actual time node 77 = 85.65910 (SD = 2.71431) ( 80.66501, 91.22100)  
Actual time node 78 = 95.66920 (SD = 3.81944) ( 88.71617, 103.60531)  
Actual time node 79 = 60.97842 (SD = 4.78454) ( 51.68805, 70.37816)  
Actual time node 80 = 70.33391 (SD = 4.35596) ( 61.98168, 79.10897)  
Actual time node 81 = 103.29612 (SD = 4.70377) ( 94.82124, 113.18263)  
Actual time node 82 = 107.82694 (SD = 5.30971) ( 98.30160, 119.01559)

**Murphy *et al.* (1) tree; 3' UTRs only; mean value of prior distribution set at 105 million years for the base of crown-group Placentalia; “hopefully good starting state” (2) for Markov chain; all constraints; opossum outgroup**

Actual time node 42 = 60.50644 (SD = 2.60578) ( 54.29885, 64.26107)  
Actual time node 43 = 62.31636 (SD = 2.30553) ( 56.39850, 64.92374)  
Actual time node 44 = 17.44513 (SD = 3.69943) ( 11.22811, 25.84853)  
Actual time node 45 = 70.40703 (SD = 5.94365) ( 58.91607, 82.41175)  
Actual time node 46 = 71.45146 (SD = 5.96261) ( 60.02273, 83.56450)  
Actual time node 47 = 79.03404 (SD = 5.26049) ( 69.28248, 89.95131)  
Actual time node 48 = 81.53036 (SD = 5.22880) ( 71.92894, 92.42869)  
Actual time node 49 = 68.61902 (SD = 6.09006) ( 56.77065, 80.85809)  
Actual time node 50 = 74.09661 (SD = 5.63755) ( 63.40505, 85.44093)  
Actual time node 51 = 79.94042 (SD = 4.91768) ( 70.95258, 90.23976)  
Actual time node 52 = 41.44442 (SD = 7.32801) ( 28.26665, 56.87621)  
Actual time node 53 = 44.49844 (SD = 6.16960) ( 32.78168, 57.18834)  
Actual time node 54 = 14.48962 (SD = 2.14998) ( 12.07321, 20.00888)  
Actual time node 55 = 66.24059 (SD = 5.85709) ( 55.07374, 77.93680)  
Actual time node 56 = 72.56193 (SD = 5.50862) ( 62.26922, 83.91765)  
Actual time node 57 = 79.70427 (SD = 4.88044) ( 70.75468, 89.79695)  
Actual time node 58 = 81.64458 (SD = 4.87535) ( 72.82954, 91.64518)  
Actual time node 59 = 55.60740 (SD = 3.44658) ( 50.31690, 62.33294)  
Actual time node 60 = 73.80313 (SD = 4.07958) ( 65.91922, 82.11518)  
Actual time node 61 = 52.71331 (SD = 2.17644) ( 48.07394, 56.56383)  
Actual time node 62 = 56.05957 (SD = 1.14096) ( 54.12161, 57.90125)  
Actual time node 63 = 79.45493 (SD = 3.59143) ( 72.99844, 87.04589)  
Actual time node 64 = 20.84139 (SD = 4.67989) ( 12.56695, 30.69578)  
Actual time node 65 = 53.36474 (SD = 1.20835) ( 52.04095, 56.38730)  
Actual time node 66 = 55.92420 (SD = 1.82653) ( 52.83643, 59.85148)  
Actual time node 67 = 60.27096 (SD = 2.06156) ( 55.97717, 63.84580)  
Actual time node 68 = 62.70784 (SD = 1.74751) ( 58.52970, 64.91665)  
Actual time node 69 = 80.56616 (SD = 3.64534) ( 74.01334, 88.44504)  
Actual time node 70 = 22.75553 (SD = 5.88751) ( 12.31081, 34.78507)  
Actual time node 71 = 55.12503 (SD = 3.48232) ( 46.89908, 59.79279)  
Actual time node 72 = 51.52899 (SD = 4.72209) ( 41.69368, 59.90775)  
Actual time node 73 = 58.00514 (SD = 3.62357) ( 49.76667, 63.80195)  
Actual time node 74 = 81.45312 (SD = 3.72892) ( 74.77056, 89.56556)  
Actual time node 75 = 68.82611 (SD = 4.05091) ( 63.28217, 78.17413)

Actual time node 76 = 76.20646 (SD = 4.19033) ( 68.73632, 85.13652)  
Actual time node 77 = 82.79477 (SD = 3.89254) ( 75.86520, 91.22995)  
Actual time node 78 = 86.61728 (SD = 4.56333) ( 78.61262, 96.69639)  
Actual time node 79 = 66.81710 (SD = 5.76992) ( 58.91004, 80.22686)  
Actual time node 80 = 67.99675 (SD = 5.73909) ( 60.36359, 81.61007)  
Actual time node 81 = 94.11649 (SD = 5.74685) ( 84.22506, 106.77517)  
Actual time node 82 = 97.20960 (SD = 6.11096) ( 86.69782, 110.46267)

**Murphy *et al.* (1) tree; mtRNA genes; mean value of prior distribution set at 105 million years for the base of crown-group Placentalia; “hopefully good starting state” (2) for Markov chain; all constraints; opossum outgroup**

Actual time node 42 = 55.31097 (SD = 4.14748) ( 46.55412, 62.49848)  
Actual time node 43 = 61.84285 (SD = 2.53539) ( 55.61053, 64.90401)  
Actual time node 44 = 37.28264 (SD = 6.59867) ( 25.81674, 51.32340)  
Actual time node 45 = 60.66895 (SD = 7.31457) ( 46.80170, 75.53977)  
Actual time node 46 = 73.29164 (SD = 6.32651) ( 61.28505, 86.36994)  
Actual time node 47 = 73.90419 (SD = 6.34069) ( 61.89807, 87.02202)  
Actual time node 48 = 82.43968 (SD = 5.55339) ( 72.10205, 93.90571)  
Actual time node 49 = 73.81060 (SD = 6.27848) ( 62.07230, 86.57330)  
Actual time node 50 = 58.21156 (SD = 7.10349) ( 44.78634, 72.88614)  
Actual time node 51 = 74.31792 (SD = 6.29647) ( 62.62444, 87.18556)  
Actual time node 52 = 56.48927 (SD = 6.75853) ( 43.79334, 70.33316)  
Actual time node 53 = 51.88724 (SD = 7.49127) ( 38.00789, 67.18893)  
Actual time node 54 = 23.58095 (SD = 4.90644) ( 15.09957, 34.29675)  
Actual time node 55 = 67.38472 (SD = 6.37529) ( 55.41909, 80.37619)  
Actual time node 56 = 72.87914 (SD = 6.17744) ( 61.47234, 85.38784)  
Actual time node 57 = 76.98934 (SD = 6.00840) ( 65.76908, 89.51120)  
Actual time node 58 = 83.69529 (SD = 5.54670) ( 73.44017, 95.12632)  
Actual time node 59 = 53.77545 (SD = 2.93875) ( 50.11943, 60.88099)  
Actual time node 60 = 71.74685 (SD = 4.18417) ( 63.34680, 79.93246)  
Actual time node 61 = 40.85622 (SD = 5.82523) ( 29.58370, 52.04576)  
Actual time node 62 = 55.87763 (SD = 1.15159) ( 54.09080, 57.87985)  
Actual time node 63 = 74.73911 (SD = 3.69437) ( 67.75224, 82.22369)  
Actual time node 64 = 26.98126 (SD = 4.46598) ( 19.01114, 36.28970)  
Actual time node 65 = 54.10839 (SD = 1.75943) ( 52.06579, 58.51824)  
Actual time node 66 = 57.09466 (SD = 2.29329) ( 53.10016, 61.73472)  
Actual time node 67 = 59.29754 (SD = 2.32451) ( 54.69208, 63.58936)  
Actual time node 68 = 62.20627 (SD = 2.06506) ( 57.32537, 64.88973)  
Actual time node 69 = 78.67706 (SD = 3.56972) ( 72.18559, 86.18253)  
Actual time node 70 = 31.39763 (SD = 5.06277) ( 21.92201, 41.63362)  
Actual time node 71 = 55.66891 (SD = 3.32697) ( 47.56211, 59.83468)  
Actual time node 72 = 53.79148 (SD = 5.86791) ( 42.61506, 65.53248)  
Actual time node 73 = 65.13867 (SD = 4.25883) ( 56.87766, 73.71309)  
Actual time node 74 = 79.44634 (SD = 3.63032) ( 72.86834, 87.09759)  
Actual time node 75 = 68.45813 (SD = 4.15385) ( 63.21529, 78.41875)



Actual time node 76 = 73.80990 (SD = 4.87451) ( 65.62918, 84.46139)  
Actual time node 77 = 83.80984 (SD = 4.20930) ( 76.26694, 92.93742)  
Actual time node 78 = 88.48515 (SD = 4.93525) ( 79.81555, 99.12881)  
Actual time node 79 = 66.77012 (SD = 7.84500) ( 51.95619, 82.54278)  
Actual time node 80 = 81.35225 (SD = 7.06325) ( 68.16742, 95.89481)  
Actual time node 81 = 93.97970 (SD = 5.67597) ( 83.94150, 105.92776)  
Actual time node 82 = 96.53507 (SD = 5.82509) ( 86.27752, 108.82941)

**16,397-bp data set with “K/T body size” taxa; mean value of prior distribution set at 105 million years for the base of crown-group Placentalia; “hopefully good starting state” (2) for Markov chain; rat-mouse minimum, megadermatid-pteropodid minimum and maximum, and hedgehog-shrew minimum constraints were employed; opossum outgroup**

Actual time node 16 = 25.79050 (SD = 3.95710) ( 18.86680, 34.62144)  
Actual time node 17 = 75.89259 (SD = 5.37745) ( 66.23002, 87.41380)  
Actual time node 18 = 85.40020 (SD = 5.41913) ( 76.13196, 97.48777)  
Actual time node 19 = 79.20005 (SD = 4.08696) ( 72.19530, 88.39711)  
Actual time node 20 = 15.60534 (SD = 1.90059) ( 12.48238, 19.86607)  
Actual time node 21 = 70.30944 (SD = 3.96301) ( 63.31728, 78.85440)  
Actual time node 22 = 84.51665 (SD = 4.20905) ( 77.45196, 94.05009)  
Actual time node 23 = 57.92997 (SD = 1.70705) ( 53.78127, 59.93098)  
Actual time node 24 = 54.01575 (SD = 2.40516) ( 48.85390, 58.28946)  
Actual time node 25 = 65.16529 (SD = 1.98203) ( 61.03855, 68.96477)  
Actual time node 26 = 65.29372 (SD = 2.03272) ( 63.06712, 70.51451)  
Actual time node 27 = 73.09892 (SD = 2.54190) ( 69.20294, 79.15772)  
Actual time node 28 = 81.73488 (SD = 3.43377) ( 76.15962, 89.70275)  
Actual time node 29 = 90.23930 (SD = 4.56641) ( 82.72058, 100.74859)  
Actual time node 30 = 102.11652 (SD = 6.34365) ( 91.49069, 116.21416)

**16,397-bp data set with “K/T body size” taxa; mean value of prior distribution set at 65 million years for the base of crown-group Placentalia; “hopefully good starting state” (2) for Markov chain; rat-mouse minimum, megadermatid-pteropodid minimum and maximum, and hedgehog-shrew minimum constraints were employed; opossum outgroup**

Actual time node 16 = 25.67478 (SD = 3.94509) ( 18.78921, 34.27888)  
Actual time node 17 = 74.67510 (SD = 4.95890) ( 65.47658, 85.29592)  
Actual time node 18 = 83.91616 (SD = 4.94813) ( 75.17654, 94.69847)  
Actual time node 19 = 78.30695 (SD = 3.82635) ( 71.77568, 86.56803)  
Actual time node 20 = 15.62934 (SD = 1.92015) ( 12.51412, 19.95361)  
Actual time node 21 = 69.73970 (SD = 3.75645) ( 63.03293, 77.58950)  
Actual time node 22 = 83.42591 (SD = 3.95575) ( 76.65135, 92.06676)  
Actual time node 23 = 57.91071 (SD = 1.74121) ( 53.58417, 59.92863)  
Actual time node 24 = 53.96822 (SD = 2.39637) ( 48.82218, 58.17985)  
Actual time node 25 = 64.98880 (SD = 1.94825) ( 60.89990, 68.67545)  
Actual time node 26 = 65.08649 (SD = 1.86312) ( 63.06306, 69.84094)

Actual time node 27 = 72.65324 (SD = 2.39279) ( 68.85275, 78.04345)  
Actual time node 28 = 80.88349 (SD = 3.26328) ( 75.34498, 88.02596)  
Actual time node 29 = 88.81325 (SD = 4.26821) ( 81.39663, 98.13646)  
Actual time node 30 = 99.75396 (SD = 5.82445) ( 89.53775, 112.37645)

**16,397-bp data set with “K/T body size” taxa; mean value of prior distribution set at 146 million years for the base of crown-group Placentalia; “hopefully good starting state” (2) for Markov chain; rat-mouse minimum, megadermatid-pteropodid minimum and maximum, and hedgehog-shrew minimum constraints were employed; opossum outgroup**

Actual time node 16 = 25.99935 (SD = 3.92723) ( 19.26454, 34.59454)  
Actual time node 17 = 76.77762 (SD = 5.57453) ( 66.97789, 88.95542)  
Actual time node 18 = 86.47847 (SD = 5.61232) ( 76.96989, 98.81250)  
Actual time node 19 = 79.89137 (SD = 4.24966) ( 72.71912, 89.35910)  
Actual time node 20 = 15.67304 (SD = 1.90869) ( 12.56486, 19.93907)  
Actual time node 21 = 70.82142 (SD = 4.12539) ( 63.52615, 79.85909)  
Actual time node 22 = 85.30280 (SD = 4.36379) ( 78.19742, 95.37808)  
Actual time node 23 = 57.96634 (SD = 1.70721) ( 53.68418, 59.94461)  
Actual time node 24 = 54.03329 (SD = 2.42083) ( 48.72840, 58.37202)  
Actual time node 25 = 65.31980 (SD = 2.01138) ( 61.16440, 69.17975)  
Actual time node 26 = 65.44970 (SD = 2.10022) ( 63.07904, 70.80596)  
Actual time node 27 = 73.46128 (SD = 2.59772) ( 69.37992, 79.42209)  
Actual time node 28 = 82.33530 (SD = 3.52502) ( 76.56756, 90.51076)  
Actual time node 29 = 91.22766 (SD = 4.71635) ( 83.48285, 101.98794)  
Actual time node 30 = 103.75564 (SD = 6.55944) ( 92.79795, 118.52694)

### **3. Basal Divergences in Tubulidentata, Hyracoidea, Proboscidea, Sirenia, Pholidota, Scandentia, Dermoptera, and Macroscelidea**

Our taxon sampling indexes basal or near basal divergences in 10 of 18 eutherian orders, but not for Tubulidentata, Hyracoidea, Proboscidea, Sirenia, Pholidota, Scandentia, Dermoptera, and Macroscelidea. Available evidence suggests that none of these orders has crown-group cladogenesis as far back as the K/T boundary. *Orycteropus afer* is the sole living representative of the order Tubulidentata and crown-group diversity is entirely intraspecific. Hyracoids first appear in the fossil record in the early Eocene and were formerly a diverse group (3). Present diversity includes only one extant family (Procaviidae) that first appears in the fossil record in the early Miocene (3), so it is highly unlikely that divergences within this family approach the K/T boundary. *Elephas* and *Loxodonta* are the only extant genera in Proboscidea, and paleontological data suggest that these two genera diverged approximately 5 mya (4). Sirenia includes the extant families Dugongidae (dugongs) and Trichechidae (manatees). Domning (5) estimated that these families diverged in the late Eocene to early Oligocene based on the fossil record. Application of the Thorne *et al.* (2) approach with a smaller data set (mtRNA genes; *VWF*; *IRBP*) suggests that these families diverged in the Oligocene (C. Douady, M. Springer, and M. Stanhope, unpublished data). Stem pholidotans are known from the late Paleocene (3). However, crown-group Pholidota includes only one family (Manidae). The oldest fossils from crown-group Manidae are of middle Eocene age. The oldest fossils from crown-group

Scandentia are from the middle Eocene. Dermoptera (3) includes fossils from the early Paleocene, but there is only a single extant genus (*Cynocephalus*); the oldest *Cynocephalus* fossils are from the Recent (3). Finally, Macroscelidea includes a single extant family (Macroscelididae) with four extant genera: *Macroscelides*, *Elephantulus*, and *Petrodromus* are included in the subfamily Macroscelidinae; *Rhynchocyon* is included in the subfamily Rhynchocyoninae. Taxonomic sampling from Murphy *et al.* (1) did not include *Rhynchocyon*, but application of the Thorne *et al.* (2) approach with a smaller data set (mtRNA genes; *VWF*; *IRBP*) suggests that *Rhynchocyon* diverged from other elephant shrews approximately in the Eocene (C. Douady, M. Springer, and M. Stanhope, unpublished data).

## References

1. Murphy, W. J., Eizirik, E., O'Brien, S. J., Madsen, O., Scally, M., Douady, C. J., Teeling, E., Ryder, O. A., Stanhope, M. J., de Jong, W. W. & Springer, M. S. (2001) *Science* **294**, 2348-2351.
2. Thorne, J. L., Kishino, H. & Painter, I. S. (1998) *Mol. Biol. Evol.* **15**, 1647-1657.
3. McKenna, M. C. & Bell, S. K. (1997) *Classification of Mammals Above the Species Level* (Columbia Univ. Press, New York).
4. Coppens, Y., Maglio, V. J., Madden, C. T. & Beden, M. (1978) in *Evolution of African Mammals*, eds. Maglio, V. J. & Cooke, H. B. S. (Harvard Univ. Press, Cambridge, MA), pp. 336-367.
5. Domning, D. P. (1994) *Proc. San Diego Soc. Nat. Hist.* **29**, 177-189.
